# Supplementary material for: α-Tocopherol-anchored gemini lipids with delocalizable cationic head groups: the effect of spacer length on DNA compaction and transfection properties
Source: Royal Society of Chemistry journal article supplement (doi:10.1039/d1ob00475a), 2021-01-01
Supplement: d1ob00475a1.pdf [file d1ob00475a1.pdf]

## **$\alpha$ -Tocopherol-anchored gemini lipids with delocalizable cationic head groups: Effect of spacer length on DNA compaction and transfection properties**

Mallikarjun Gosangi<sup>†</sup>, Venkatesh Ravula<sup>†</sup>, Hithavani Rapaka, Srilakshmi V. Patri\*

Department of Chemistry, National Institute of Technology, Warangal, 506004, Telangana, India

\*Authors to whom the correspondence should be addressed:

P. V. Srilakshmi; E-mail: [patrisrilakshmi@gmail.com](mailto:patrisrilakshmi@gmail.com)

<sup>†</sup> Both authors contributed equally to this manuscript.

### **Supporting Information**

#### **Table of Contents**

##### **1. Spectral data of alpha-tocopherol based dimeric cationic lipids.**

**Fig. S1** <sup>1</sup>H-NMR spectra of Toc-Imidazole

**Fig. S2** <sup>1</sup>H-NMR spectra of TIM 2

**Fig. S3** <sup>13</sup>C-NMR spectra of TIM 2

**Fig. S4** ESI-MS (HRMS) spectra of TIM 2

**Fig. S5** <sup>1</sup>H-NMR spectra of TIM 4

**Fig. S6** <sup>13</sup>C-NMR spectra of TIM 4

**Fig. S7** ESI-MS (HRMS) spectra of TIM 4

**Fig. S8** <sup>1</sup>H-NMR spectra of TIM 6

**Fig. S9** <sup>13</sup>C-NMR spectra of TIM 6

**Fig. S10** ESI-MS (HRMS) spectra of TIM 6

**Fig. S11** <sup>1</sup>H-NMR spectra of TIM 10

**Fig. S12** <sup>13</sup>C-NMR spectra of TIM 10

**Fig. S13** ESI-MS (HRMS) spectra of TIM 10

##### **2. HPLC Data**

**Fig. S14** HPLC spectra of TIM 2

100% Methanol

**Fig. S15** HPLC spectra of TIM 4

100% Methanol

**Fig. S16** HPLC spectra of TIM 6

100% Methanol

**Fig. S17** HPLC spectra of TIM 10

100% Methanol

**Fig. S18** Electrophoretic gel patterns of DNA complexes incubated with 0.3  $\mu$ g of heparin sodium salt for 30 minutes.

**Fig. S19** Representative FACS histograms of HEK293 cells treated by A) pEGFP-N3 only, B) TIM 2-pEGFP-N3, C) TIM 4-pEGFP-N3, D) TIM 6-pEGFP-N3, E) TIM 10-pEGFP-N3 and F) L2K-pEGFP-N3 plasmid complexes.

**Fig. S20** Confocal laser scanning microscope images for endosomal co-localization of lipoplexes derived from rhodamine-PE labeled TIM 6 formulation (lipid:DOPE:PE) and pCMV- $\beta$ gal DNA.

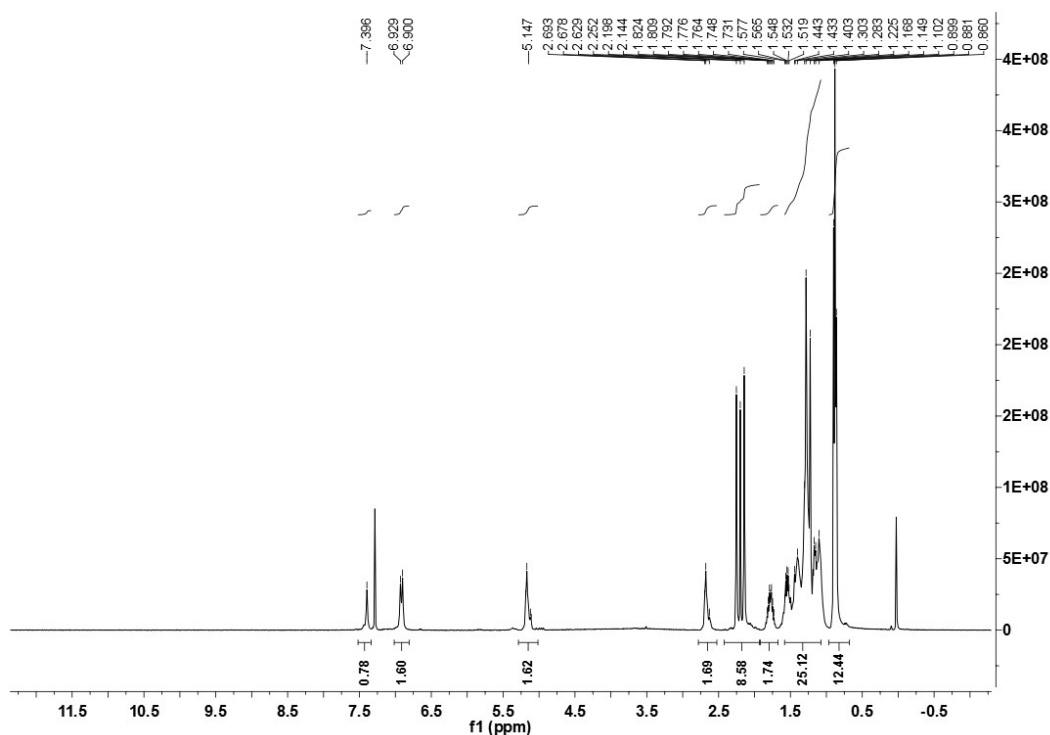

**Fig. S1:** <sup>1</sup>H-NMR (500 MHz, CDCl<sub>3</sub>) spectrum of Toc-Imidazole

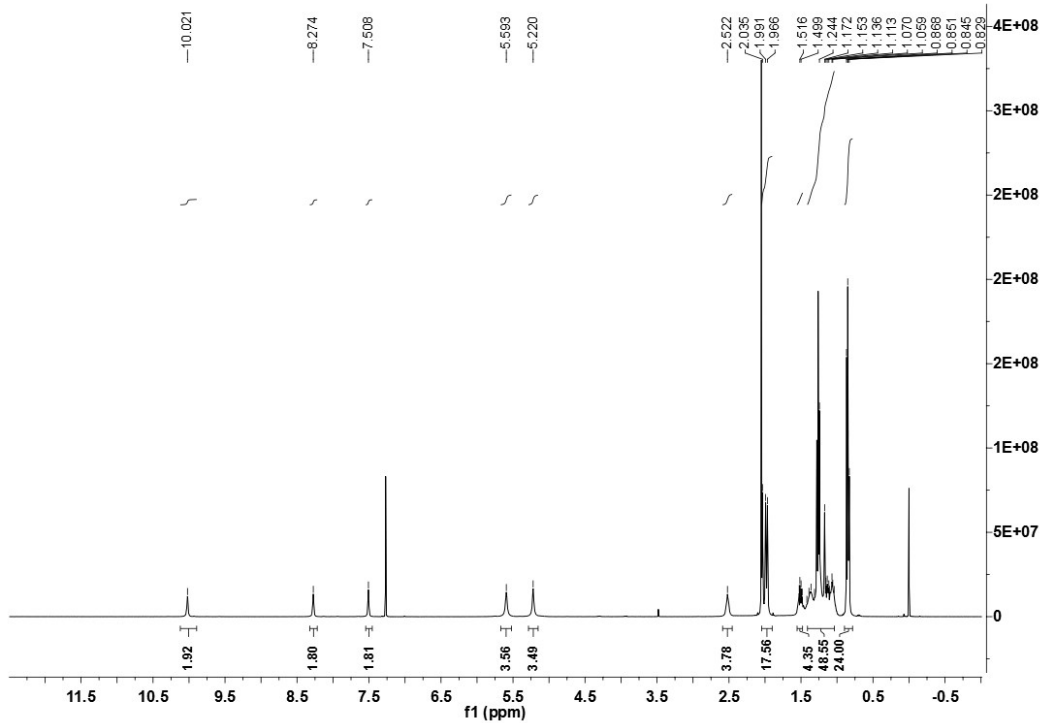

**Fig. S2:** <sup>1</sup>H-NMR (400 MHz, CDCl<sub>3</sub>) spectrum of **TIM 2**

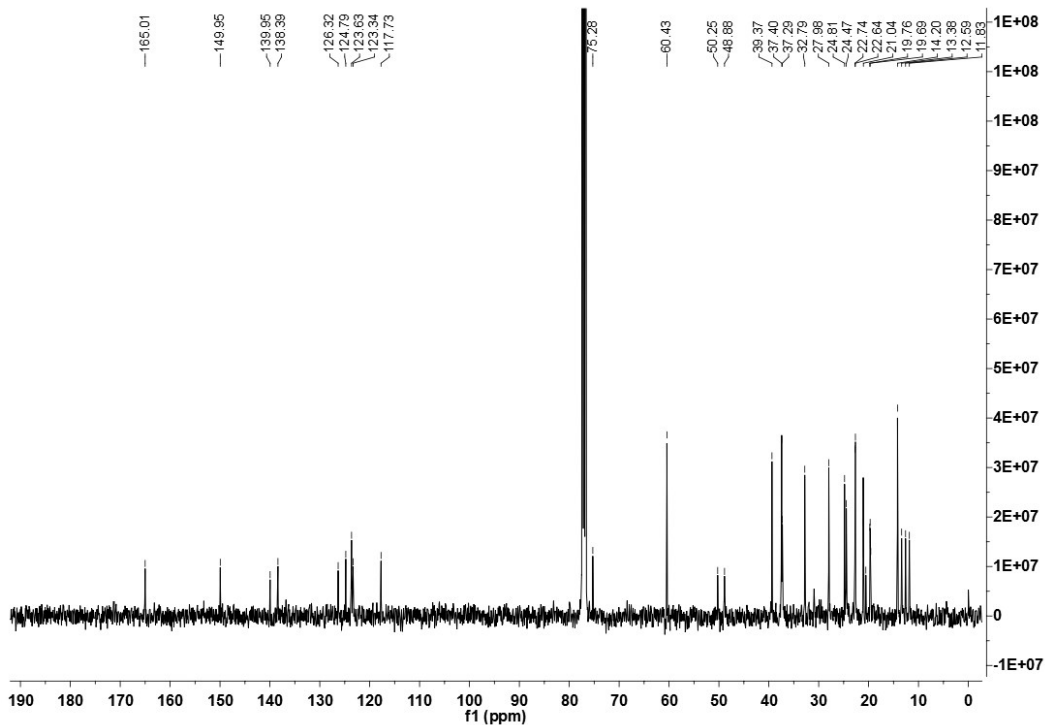

**Fig. S3:** <sup>13</sup>C-NMR (400 MHz, CDCl<sub>3</sub>) spectrum of **TIM 2**

|               |         |             |          |                 |              |                        |                        |
|---------------|---------|-------------|----------|-----------------|--------------|------------------------|------------------------|
| Sample Name   | CRR-3   | Position    | Vial 35  | Instrument Name | Instrument 1 | User Name              |                        |
| Inj Vol       | -1      | InjPosition |          | SampleType      | Sample       | IRM Calibration Status | Success                |
| Data Filename | CRR-3.d | ACQ Method  | SCS....m | Comment         |              | Acquired Time          | 11/28/2016 10:26:03 AM |

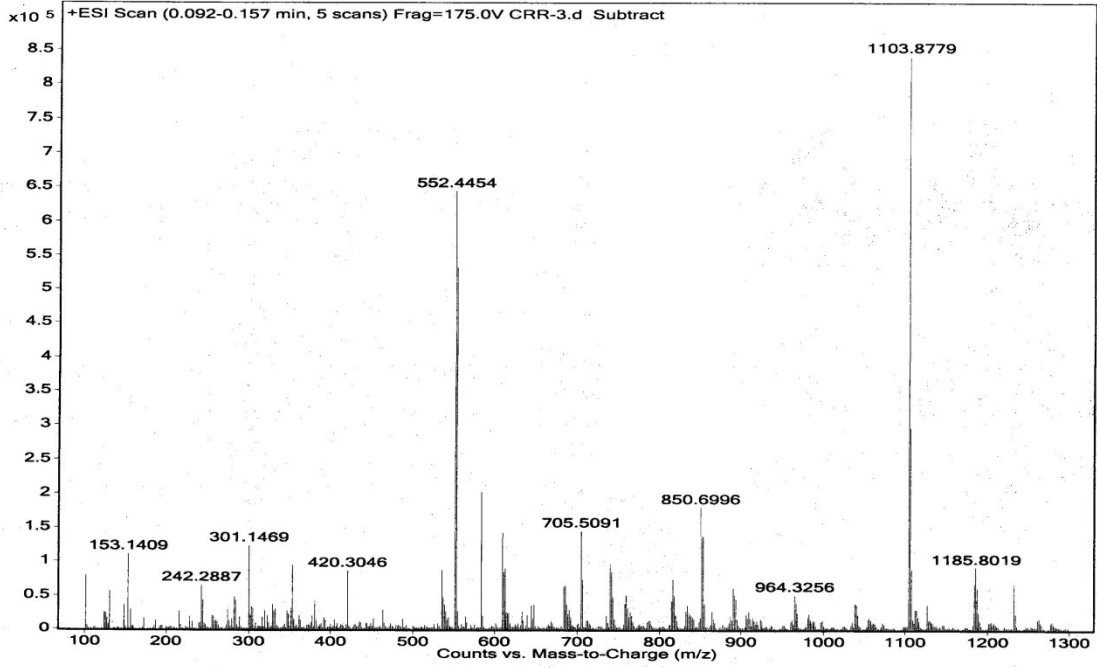

Fig. S4: ESI-HRMS Spectrum of TIM 2

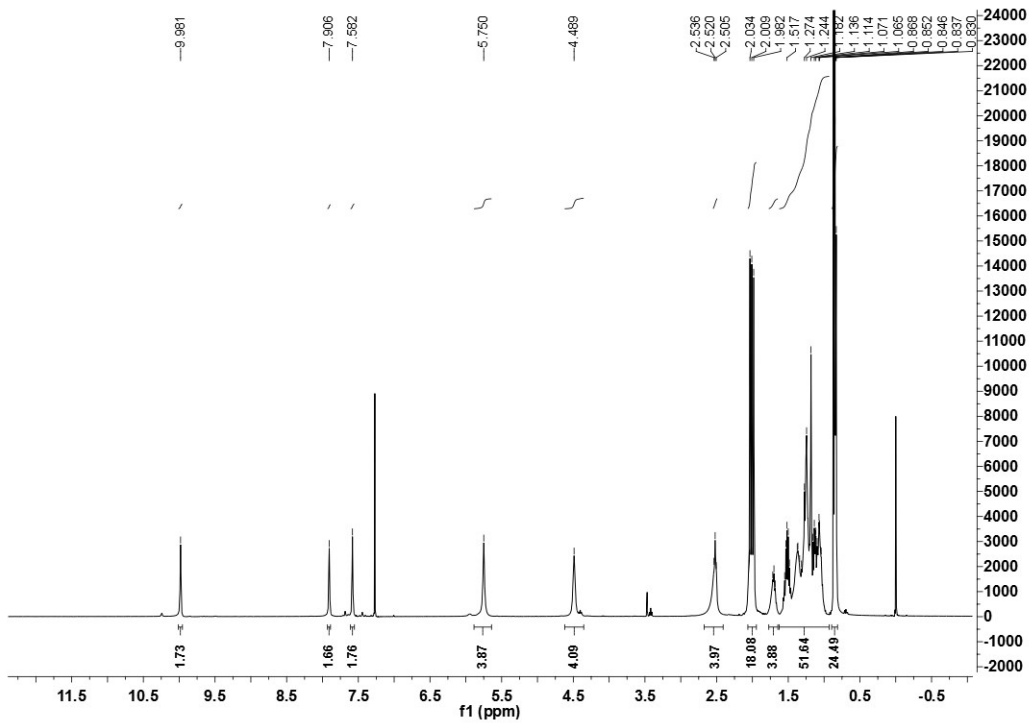

Fig. S5: <sup>1</sup>H-NMR (400 MHz, CDCl<sub>3</sub>) spectrum of TIM 4

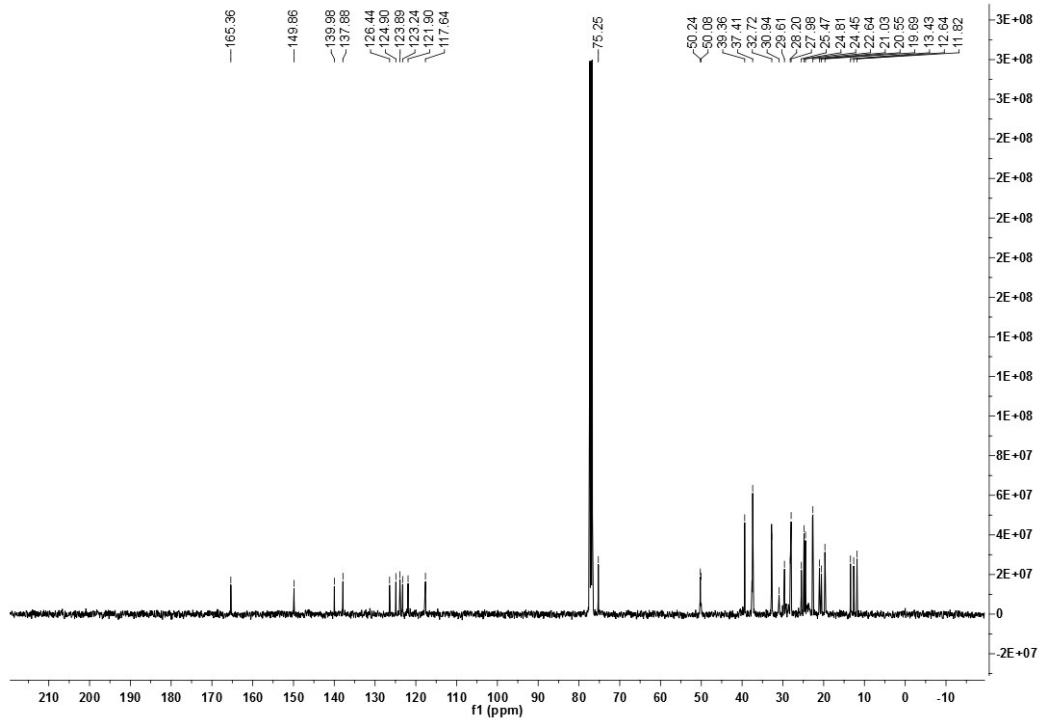

Fig. S6:  $^{13}\text{C}$ -NMR (400 MHz,  $\text{CDCl}_3$ ) spectrum of TIM 4

|               |         |             |          |                 |              |                        |                        |
|---------------|---------|-------------|----------|-----------------|--------------|------------------------|------------------------|
| Sample Name   | CRR-4   | Position    | Vial 36  | Instrument Name | Instrument 1 | User Name              |                        |
| Inj Vol       | -1      | InjPosition |          | SampleType      | Sample       | IRM Calibration Status | Success                |
| Data Filename | CRR-4.d | ACQ Method  | SCS....m | Comment         |              | Acquired Time          | 11/28/2016 10:30:04 AM |

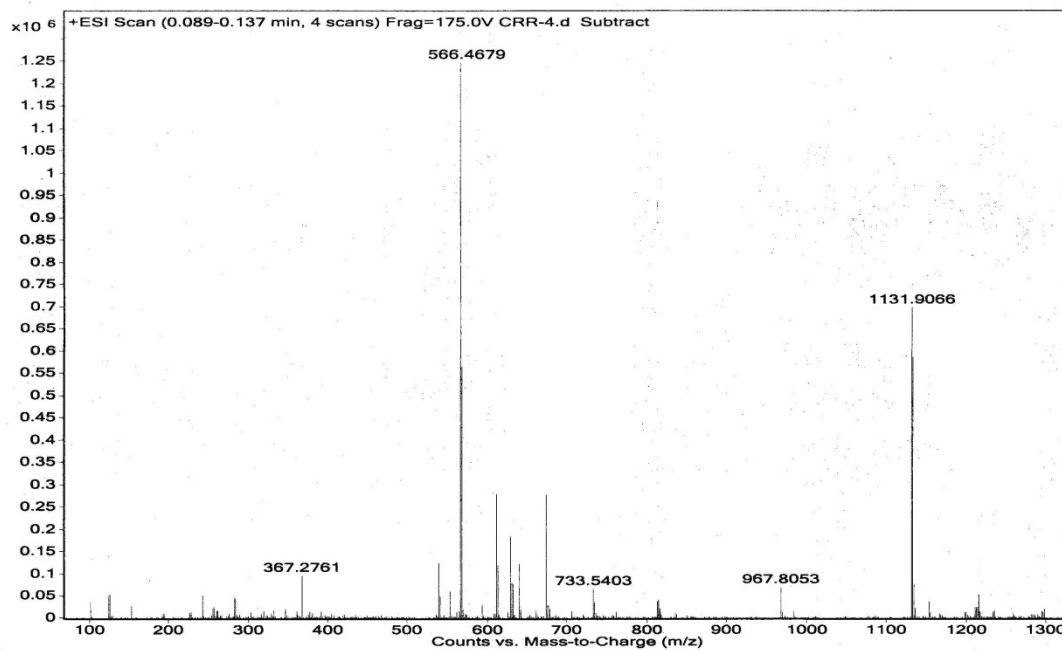

Fig. S7: ESI-HRMS Spectrum of TIM 4

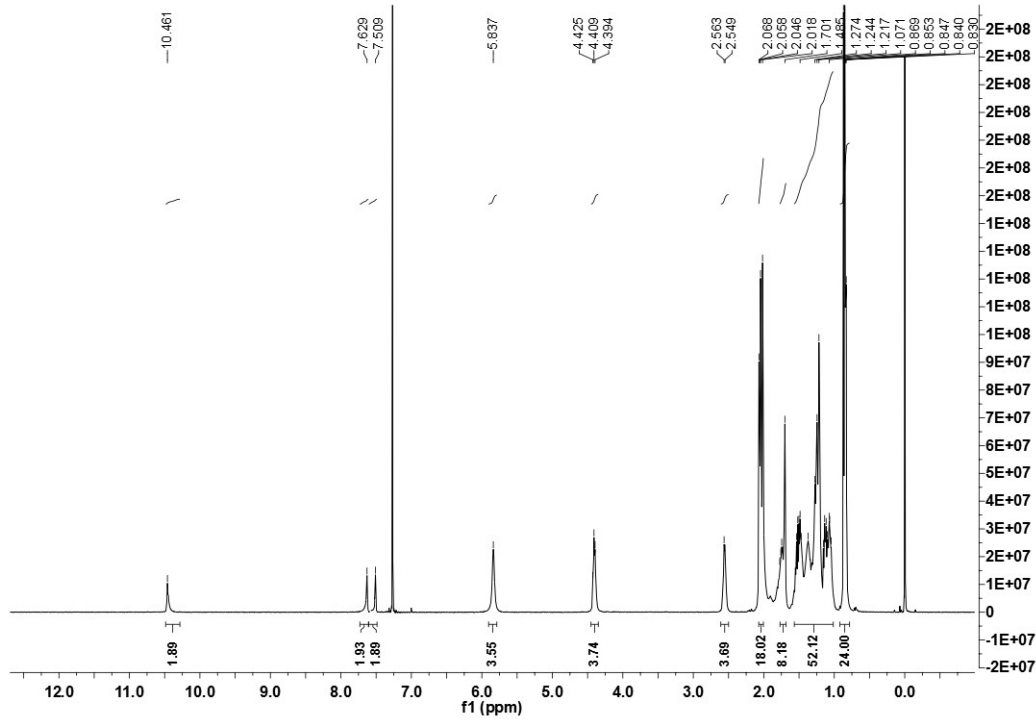

**Fig. S8:**  $^1\text{H}$ -NMR (400 MHz,  $\text{CDCl}_3$ ) spectrum of **TIM 6**

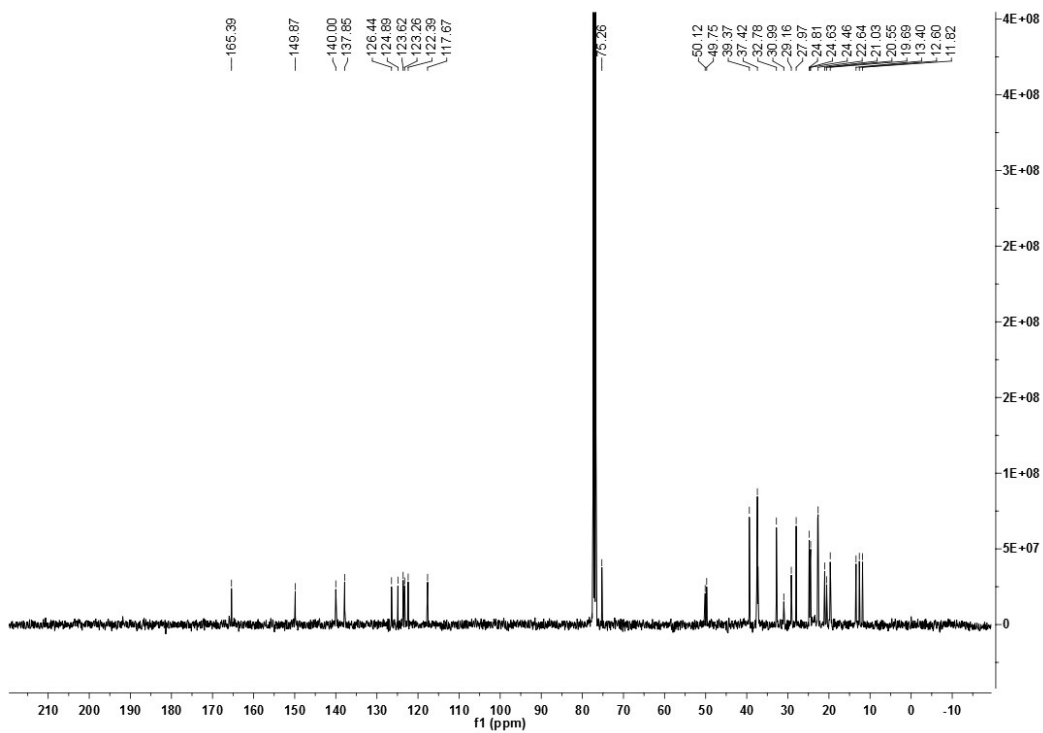

**Fig. S9:**  $^{13}\text{C}$ -NMR (400 MHz,  $\text{CDCl}_3$ ) spectrum of **TIM 6**

|               |         |             |         |                 |              |                        |                        |
|---------------|---------|-------------|---------|-----------------|--------------|------------------------|------------------------|
| Sample Name   | CRR-5   | Position    | Vial 31 | Instrument Name | Instrument 1 | User Name              |                        |
| Inj Vol       | -1      | InjPosition |         | SampleType      | Sample       | IRM Calibration Status | Success                |
| Data Filename | CRR-5.d | ACQ Method  | SCS...m | Comment         |              | Acquired Time          | 11/28/2016 10:09:55 AM |

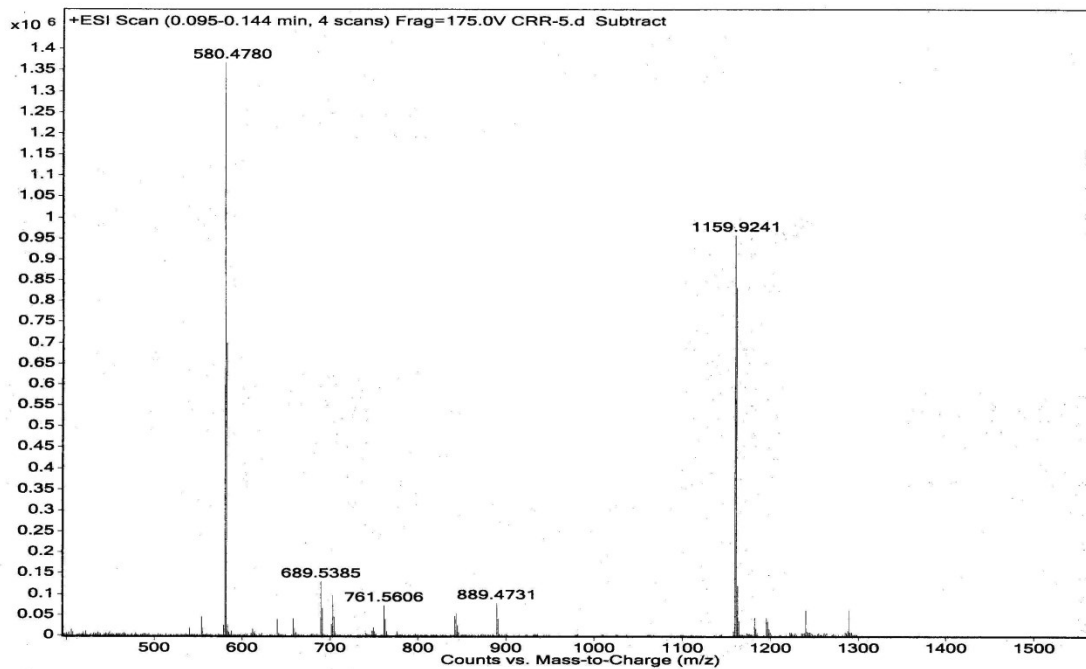

Fig. S10: ESI-HRMS Spectrum of TIM 6

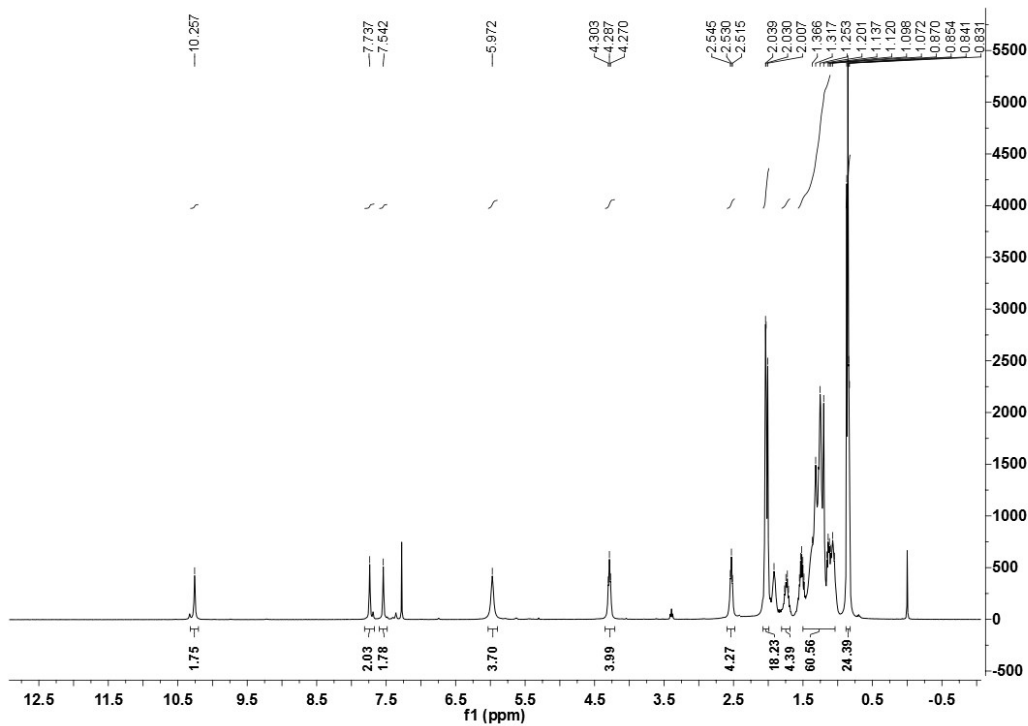

Fig. S11: <sup>1</sup>H-NMR (400 MHz, CDCl<sub>3</sub>) spectrum of TIM 10

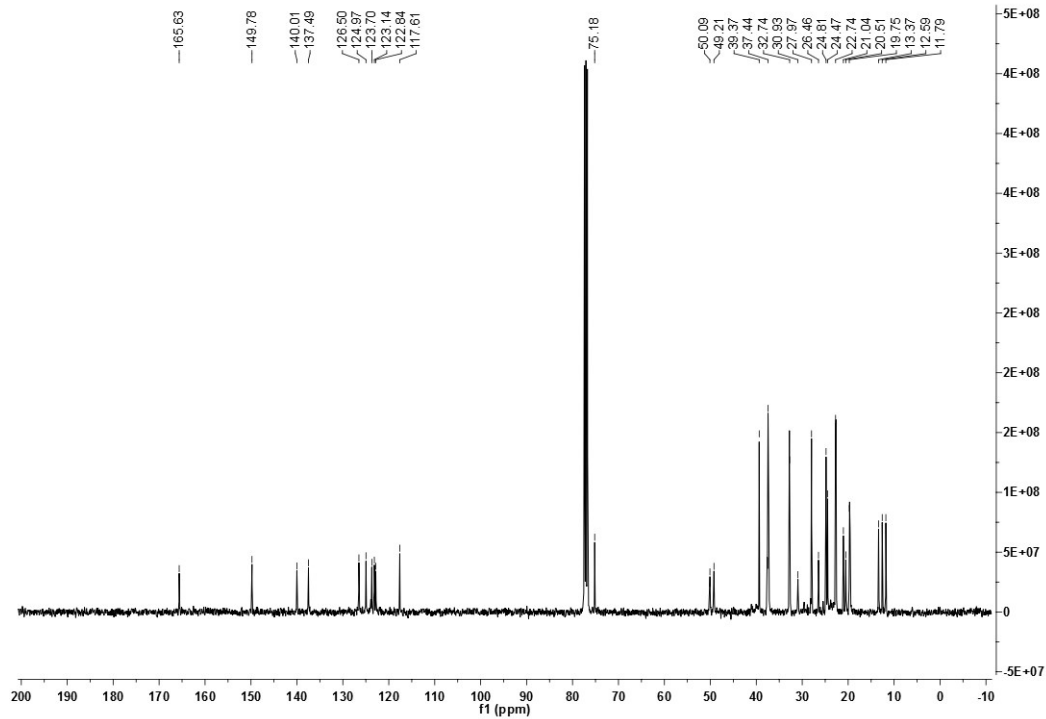

Fig. S12:  $^{13}\text{C}$ -NMR (400 MHz,  $\text{CDCl}_3$ ) spectrum of TIM 10

| Sample Name   | CRR-6   | Position    | Vial 63 | Instrument Name | Instrument 1 | User Name              |                       |
|---------------|---------|-------------|---------|-----------------|--------------|------------------------|-----------------------|
| Inj Vol       | -1      | InjPosition |         | SampleType      | Sample       | IRM Calibration Status | Success               |
| Data Filename | CRR-6.d | ACQ Method  | SCS...m | Comment         |              | Acquired Time          | 11/16/2016 3:05:47 PM |

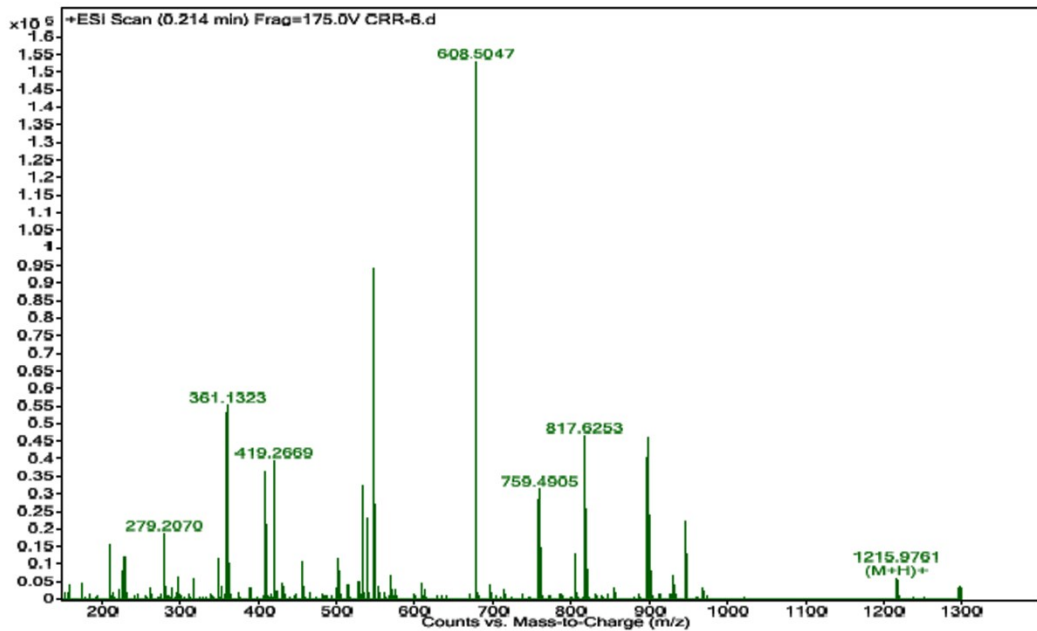

Fig. S13: ESI-HRMS Spectrum of TIM 10



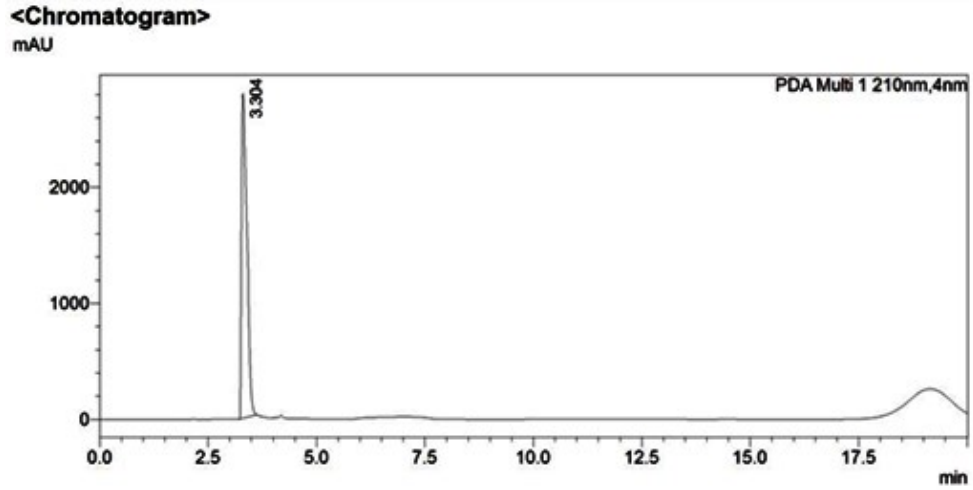

Fig. S14: HPLC chromatogram of TIM 2

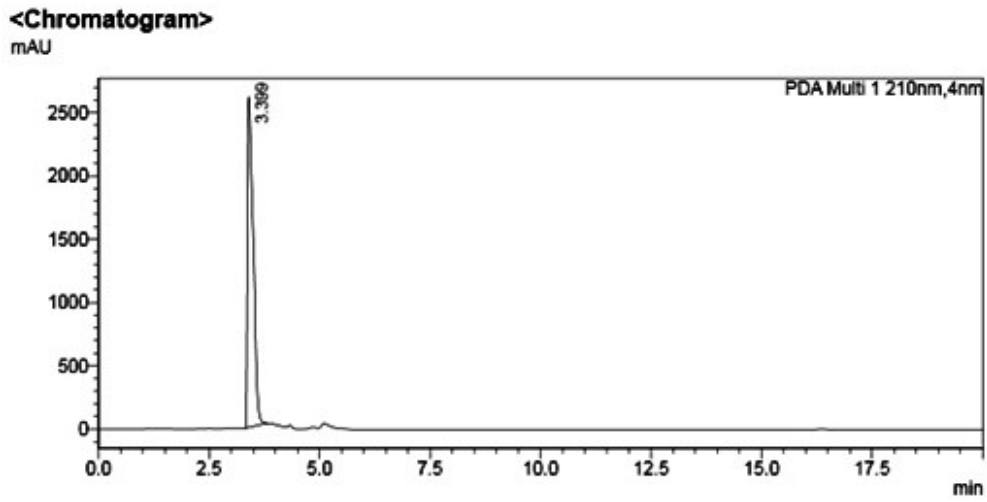

Fig. S15: HPLC chromatogram of TIM 4

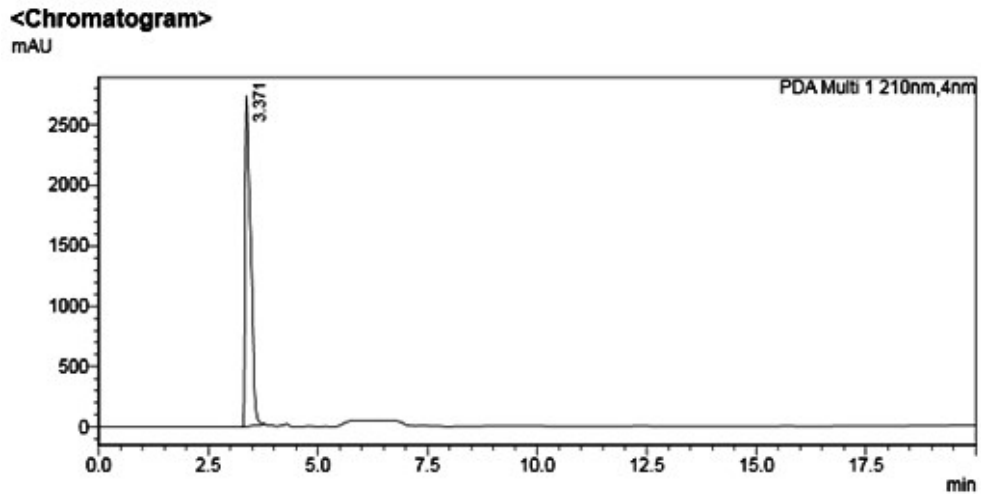

Fig. S16: HPLC chromatogram of TIM 6

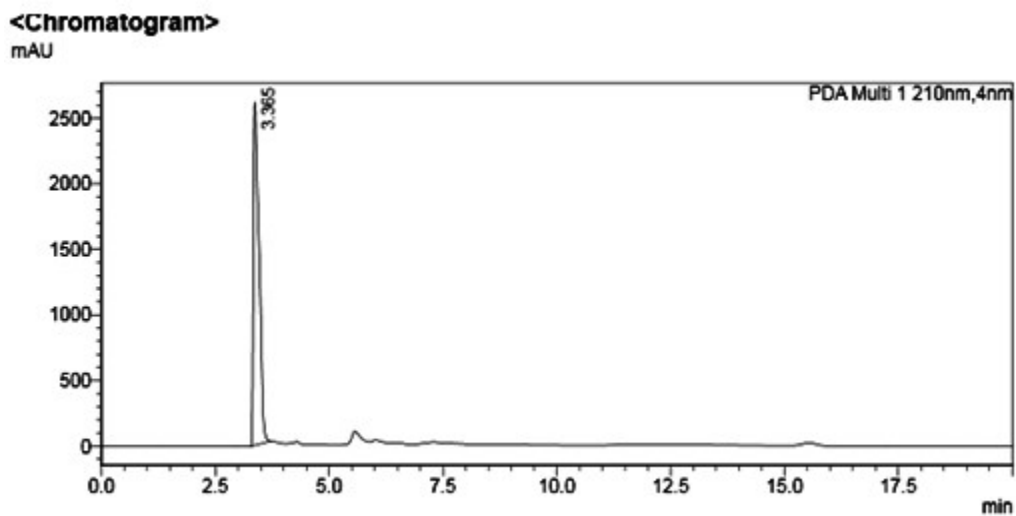

**Fig. S17:** HPLC chromatogram of TIM 10

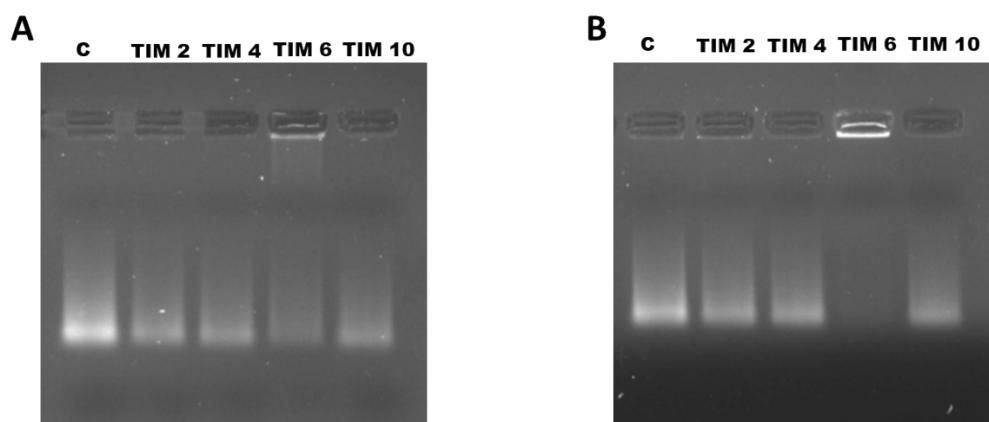

**Fig. S18:** Electrophoretic gel patterns of DNA complexes incubated with 0.3  $\mu\text{g}$  of heparin sodium salt for 30 minutes. DNA complexes are prepared with four dimeric lipid complexes at N/P ratios 2: 1 (A) and 4:1 (B). Naked DNA serves as control “C”.

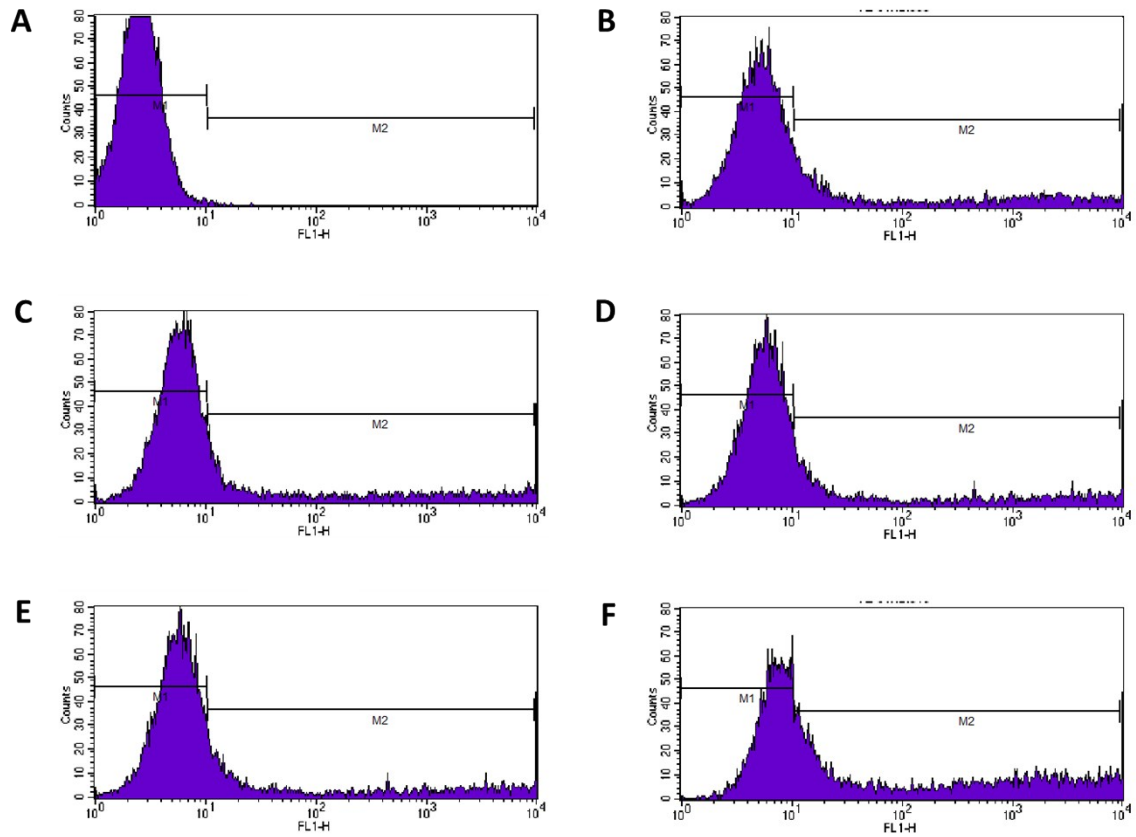

**Fig. S19** Representative FACS histograms of HEK293 cells treated by A) pEGFP-N3 only, B) TIM 2-pEGFP-N3, C) TIM 4-pEGFP-N3, D) TIM 6-pEGFP-N3, E) TIM 10-pEGFP-N3 and F) L2K-pEGFP-N3 plasmid complexes.

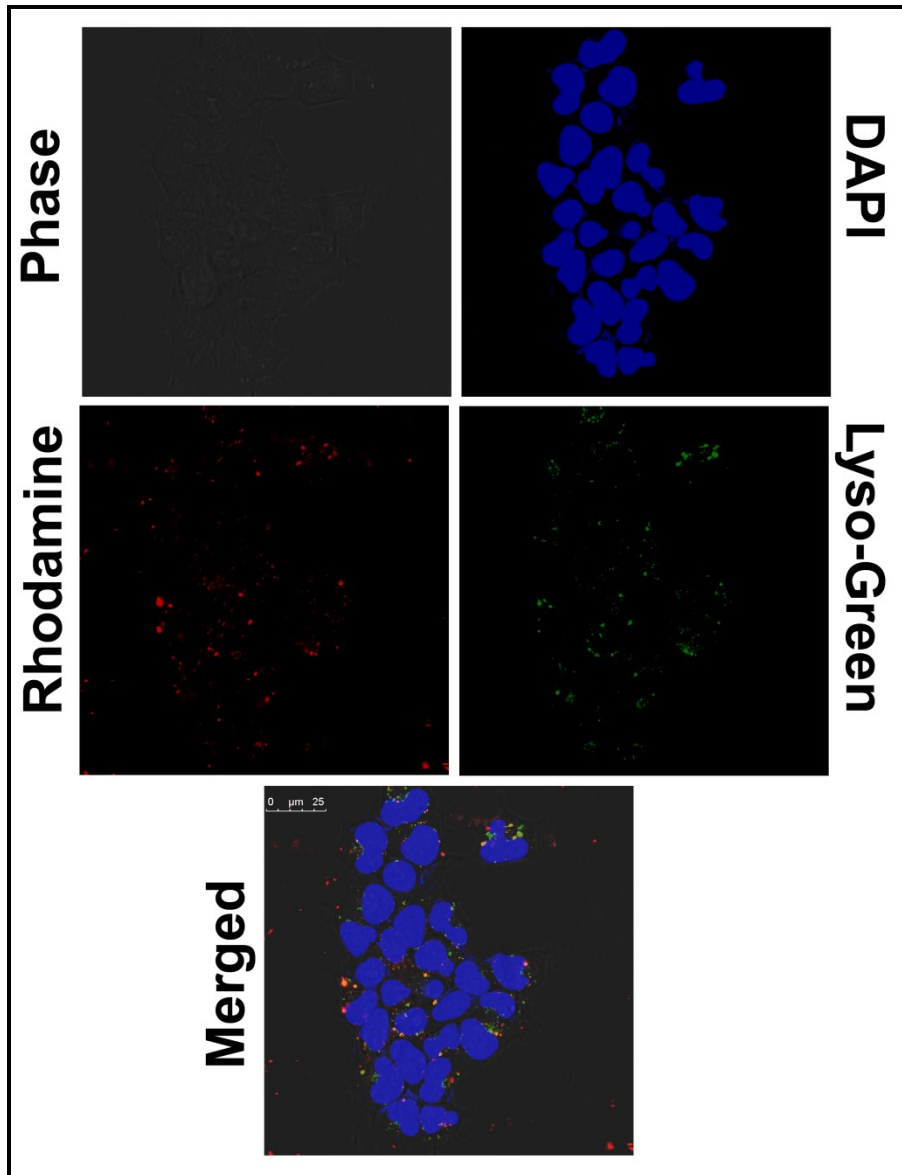

**Fig. S20** Confocal laser scanning microscope images for endosomal co-localization of lipoplexes derived from rhodamine-PE labeled **TIM 6** formulation (lipid:DOPE:PE) and pCMV- $\beta$ gal DNA. Acidic compartments and nuclear regions were stained with lysotracker green and DAPI blue respectively in HEK 293 cells.
